# Supplementary material for: Sensitive detection of protein ubiquitylation using a protein fragment complementation assay
Source: Oxford University Press journal article supplement (doi:10.1242/jcs.240093), 2020-05-14
Supplement: jcs240093supp.pdf [file jcs240093supp.pdf]

# 1. Supplementary Figures

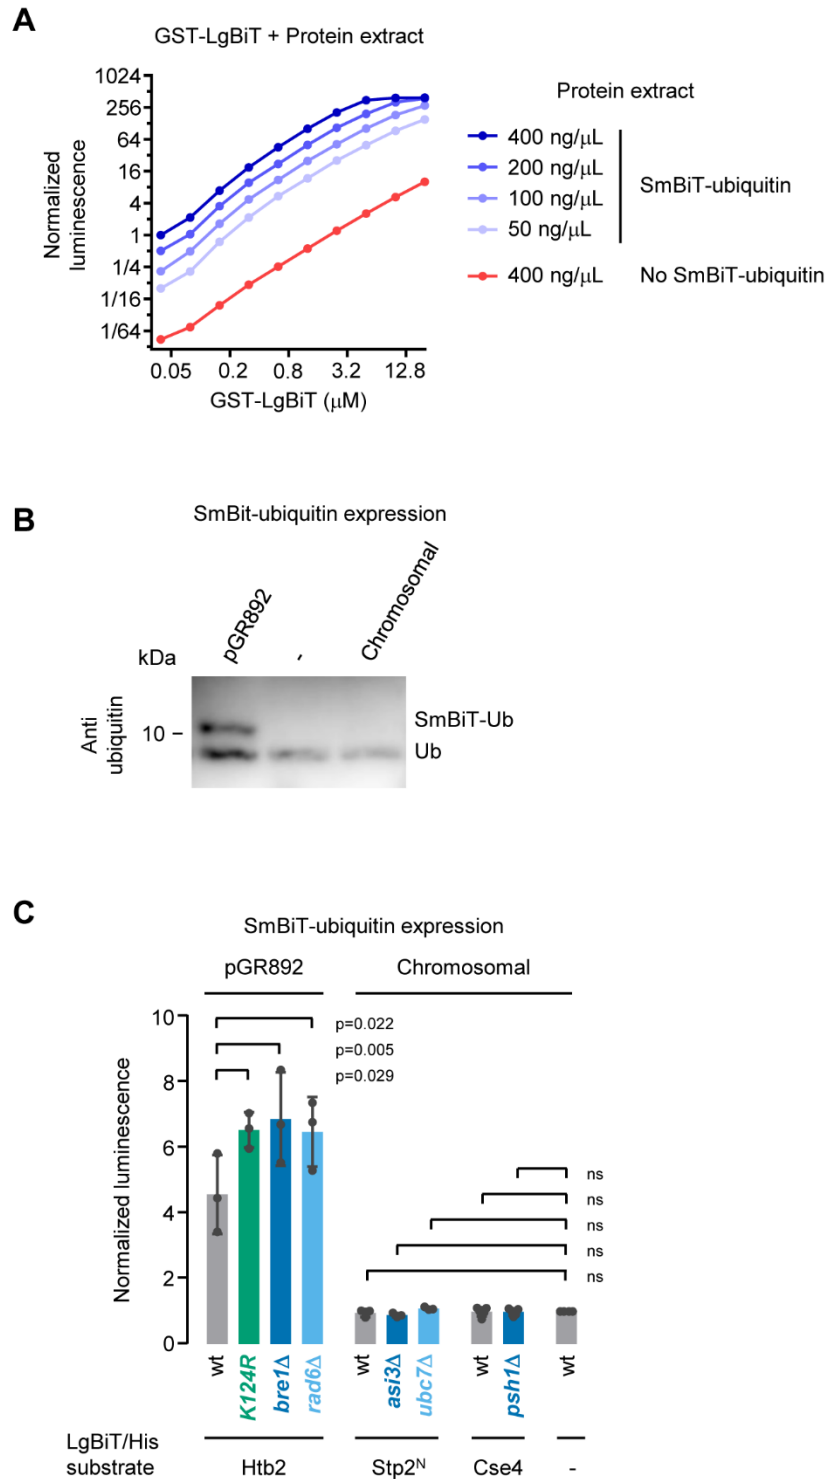

### **Fig. S1: Analysis of SmBiT-ubiquitin expression.**

**(A)** Quantification of SmBiT-ubiquitin in protein extracts. Protein extracts were prepared from control cells or from cells expressing SmBiT-ubiquitin from the pGR892 plasmid. Extracts were diluted at the indicated concentrations and supplemented with varying amounts of GST-LgBiT before measuring their luminescence. Luminescence values were normalized to 1 in the sample having the highest concentration of SmBiT-ubiquitin and the lowest concentration of GST-LgBiT. A wide range of GST-LgBiT concentrations produce luminescence signals that are linearly related to the concentration of SmBiT-ubiquitin in the extract. Higher GST-LgBiT concentrations yield higher luminescence signals and higher background levels. Detector saturation was observed in the samples with the highest GST-LgBiT concentration. Axis are displayed in log<sub>2</sub> scale. Mean of 3 independent experiments.

**(B)** Comparison of the expression level of SmBiT-ubiquitin and endogenous ubiquitin. Protein extracts were prepared from the indicated strains. The proteins were separated by SDS-PAGE, transferred on a PVDF membrane and revealed with an anti-ubiquitin antibody (P4D1, Santa-Cruz). Representative of 3 experiments.

**(C)** Relative expression level of SmBiT-ubiquitin in NUbICA strains. Protein extracts were prepared from the indicated strains and supplemented with 1  $\mu$ M GST-LgBiT before measuring their luminescence. Htb2 strains express SmBiT-ubiquitin from the pGR892 plasmid, while the other strains express SmBiT-ubiquitin from a chromosomally integrated expression cassette. Background subtracted luminescence values were normalized to 1 in the control strain expressing SmBiT-ubiquitin from the chromosomally integrated expression cassette. Mean  $\pm$  s.d.,  $n \geq 3$ , p-value: One-way ANOVA with Tukey's correction for multiple comparison, ns: not significant.

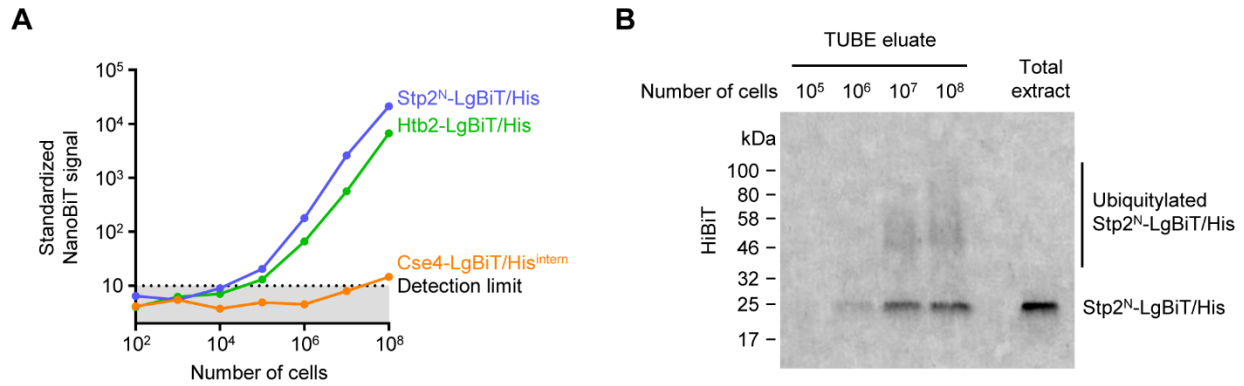

**Fig. S2: Sensitivity of NUbICA.**

(A) NUbICA sensitivity for the detection of the ubiquitylation of Htb2, Stp2<sup>N</sup> and Cse4. LgBiT/His-tagged proteins were purified from extracts prepared from 10<sup>2</sup> to 10<sup>8</sup> cells. The recorded NanoBiT signals were normalized and adjusted so that background measurements have identical standard deviations and means. The dotted line and shaded area delimit a detection limit corresponding to 5 times the standard deviation of background measurements (Detection limit). Axis are displayed in log<sub>10</sub> scale.

(B) Sensitivity of the detection of the ubiquitylation of Stp2<sup>N</sup> after TUBE pull-down. Protein extracts were prepared from 10<sup>5</sup> to 10<sup>8</sup> cells expressing Stp2-LgBiT/His. Poly-ubiquitylated proteins were then pulled-down using TUBE2-agarose, separated by SDS-PAGE and transferred onto a nitrocellulose membrane. The membrane was imaged in presence of the HiBiT peptide to reveal the migration pattern of Stp2-LgBiT/His. Representative of 2 independent experiments.

## 2. Supplementary Tables

**Table S1: List of strains in the NUBiCA collection**

[Click here to Download Table S1](#)

**Table S2: Yeast strains used in this study**

| Strain         | Background | Genotype                                                                                                     | Source                |
|----------------|------------|--------------------------------------------------------------------------------------------------------------|-----------------------|
| BY4741         | S288c      | <i>MATa his3Δ1 leu2Δ0 met15Δ0 ura3Δ0</i>                                                                     | Brachman et al., 1998 |
| BY4742         | S288c      | <i>MATa his3Δ1 leu2Δ0 lys2Δ0 ura3Δ0</i>                                                                      | Brachman et al., 1998 |
| BY4745         | S288c      | <i>MATalpha his3Δ1 leu2Δ0 met15Δ0 ura3Δ0</i>                                                                 | Brachman et al., 1998 |
| C-SWAT library | BY4741     | <i>ORF::C-SWAT-acceptor<br/>(L3-CYC1term-ScURA3-hphΔN-ALG9term-L4)</i>                                       | Meurer et al., 2018   |
| NUBiCA library | BY4745     | <i>ORF::LgbiT-HIS-HPH<br/>met17::PDC1pr-SmBiT-Ub-NAT<br/>can1Δ::STE3pr-LEU2-Gal1pr-NLS-I-SCEI<br/>lyp1Δ</i>  | This study            |
| scAB0178       | BY4742     | <i>htb2::HTB2-LgBiT/His-URA3</i>                                                                             | This study            |
| scAB0179       | BY4742     | <i>htb2::htb2(K124R)-LgBiT/His-URA3</i>                                                                      | This study            |
| scAB0180       | BY4742     | <i>htb2::HTB2-LgBiT/His-URA3<br/>bre1Δ::HPH</i>                                                              | This study            |
| scAB0181       | BY4742     | <i>htb2::HTB2-LgBiT/His-URA3<br/>rad6Δ::HPH</i>                                                              | This study            |
| scAB0190       | BY4741     | <i>stp2::STP2(1-45)-yLgBiT/His-URA<br/>lyp1Δ::PDC1pr-SmBiT-Ub-LEU<br/>can1Δ::STE2pr-SpHis5</i>               | This study            |
| scAB0191       | BY4741     | <i>stp2::STP2(1-45)-yLgBiT/His-URA<br/>asi3::HPH<br/>lyp1Δ::PDC1pr-SmBiT-Ub-LEU<br/>can1Δ::STE2pr-SpHis5</i> | This study            |
| scAB0195       | BY4741     | <i>stp2::STP2(1-45)-yLgBiT/His-URA<br/>ubc7::KAN<br/>lyp1Δ::PDC1pr-SmBiT-Ub-LEU<br/>can1Δ::STE2pr-SpHis5</i> | This study            |
| scGLD0122      | BY4741     | <i>met17::PDC1pr-SmBiT-Ub-NAT</i>                                                                            | This study            |
| scGLD0153      | BY4741     | <i>cse4::CSE4-LgBiT-10xHis-CSE4-URA<br/>psh1Δ::HPH<br/>lyp1::pPDC1-SmBiT-UBQ-Leu</i>                         | This study            |

|           |        |                                                                                                                                |                     |
|-----------|--------|--------------------------------------------------------------------------------------------------------------------------------|---------------------|
|           |        | <i>can1::STE2pr-Sphis5</i><br><i>ura3Δ::KAN</i>                                                                                |                     |
| scMLB0191 | BY4741 | <i>cse4::CSE4-LgBit-10xHis-CSE4-URA</i><br><i>lyp1::pPDC1-SmBit-UBQ-Leu</i><br><i>can1::STE2pr-Sphis5</i><br><i>ura3Δ::KAN</i> | This study          |
| YMaM1205  | BY4745 | <i>can1Δ::STE3pr-LEU2-Gal1pr-NLS-I-SCEI</i><br><i>lyp1Δ</i>                                                                    | Meurer et al., 2018 |

**Table S3: Plasmids used in this study**

| Plasmid                 | Description                                                                         | Source             |
|-------------------------|-------------------------------------------------------------------------------------|--------------------|
| pAB0010                 | Yeast/ <i>E. coli</i> shuttle plasmid, KanR, L3-yLgBiT/His-ADH1term-TEF1pr-hphΔC-L4 | This study         |
| pGEX6P1_HR23A-TUBE      | <i>E. coli</i> expression plasmid, GST-HR23A-TUBE                                   | Thimo Kurz lab     |
| pGEX6P1_ubiquilin1-TUBE | <i>E. coli</i> expression plasmid, GST-ubiquilin1-TUBE                              | Thimo Kurz lab     |
| pGR0135                 | Yeast/ <i>E. coli</i> shuttle plasmid, LEU2                                         | This study         |
| pGR0313                 | <i>E. coli</i> expression plasmid, GST                                              | Rabut et al., 2011 |
| pGR0691                 | <i>E. coli</i> expression plasmid, GST-Rx3(A7)-TUBE                                 | This study         |
| pGR0890                 | <i>E. coli</i> expression plasmid, GST-yLgBiT                                       | This study         |
| pGR0892                 | Yeast/ <i>E. coli</i> shuttle plasmid, LEU2, TEFpr-SmBiT-Ub                         | This study         |

### Table References

**Brachmann, C. B., Davies, A., Cost, G. J., Caputo, E., Li, J., Hieter, P. and Boeke, J. D.** (1998). Designer deletion strains derived from *Saccharomyces cerevisiae* S288C: a useful set of strains and plasmids for PCR-mediated gene disruption and other applications. *Yeast* **14**, 115–132.

**Meurer, M., Duan, Y., Sass, E., Kats, I., Herbst, K., Buchmuller, B. C., Dederer, V., Huber, F., Kirrmaier, D., Štefl, M., et al.** (2018). Genome-wide C-SWAT library for high-throughput yeast genome tagging. *Nat. Methods* **15**, 598–600.

**Rabut, G., Le Dez, G., Verma, R., Makhnevych, T., Knebel, A., Kurz, T., Boone, C., Deshaies, R. J. and Peter, M.** (2011). The TFIIH subunit Tfb3 regulates cullin neddylation. *Mol. Cell* **43**, 488–495.
